# Supplementary material for: Altered psychobiological reactivity but no impairment of emotion recognition following stress in adolescents with non-suicidal self-injury
Source: PubMed Central journal article supplement (PMC10070238; doi:10.1007/s00406-022-01496-4), 2022-10-06

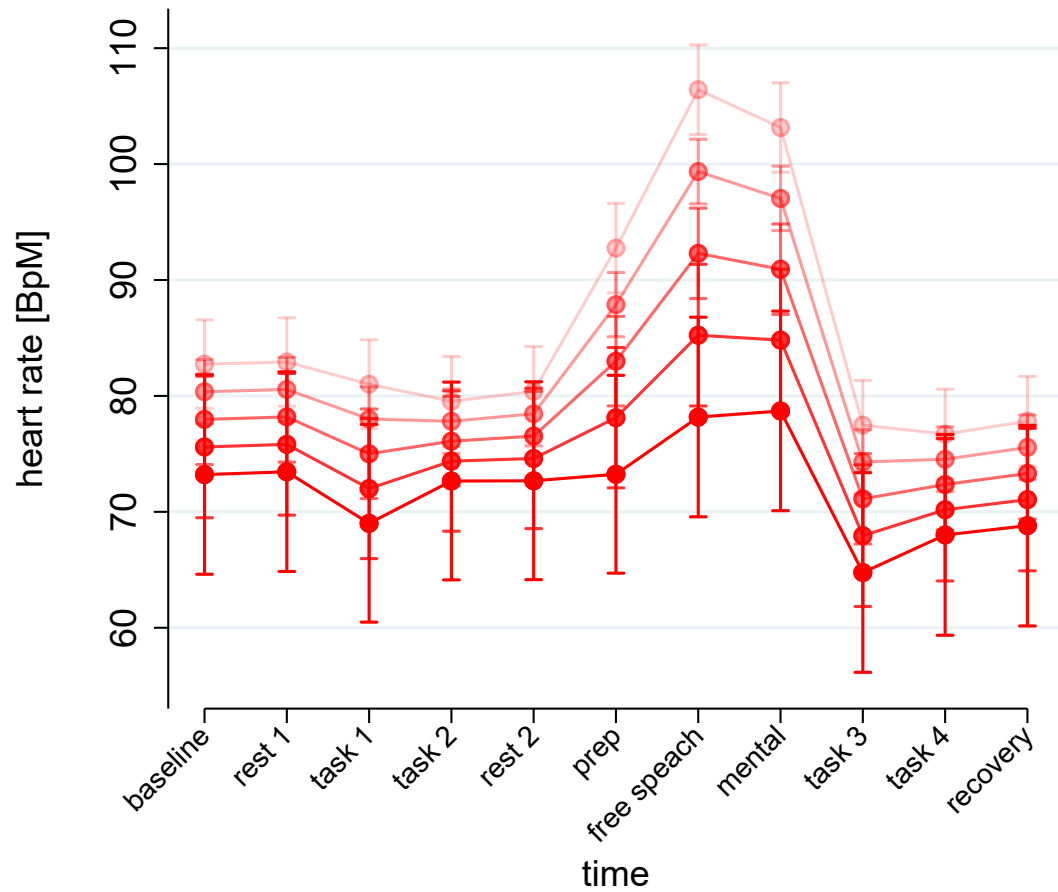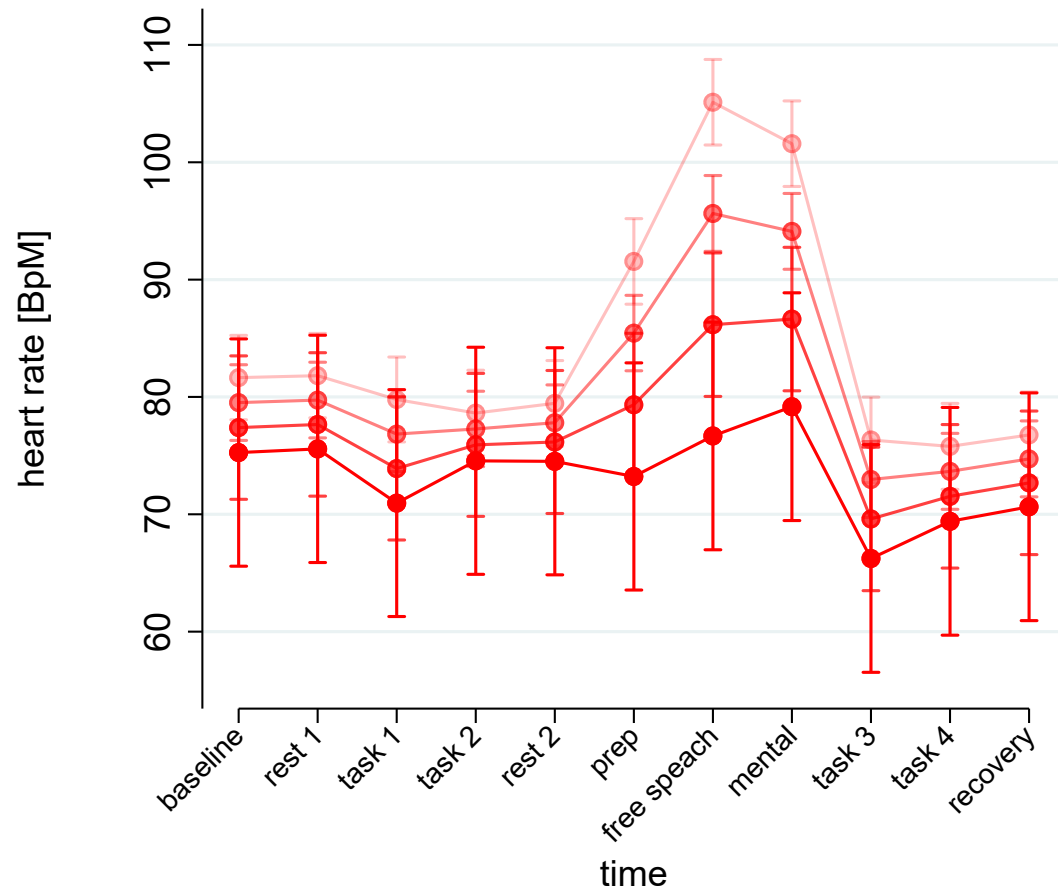

Supplement: 406_2022_1496_MOESM4_ESM.pdf [file 406_2022_1496_MOESM4_ESM.pdf]
